# Supplementary material for: Exposure to live saprophytic Leptospira before challenge with a pathogenic serovar prevents severe leptospirosis and promotes kidney homeostasis
Source: eLife. 2024 Nov 11;13:RP96470. doi: 10.7554/eLife.96470 (PMC11554301; doi:10.7554/eLife.96470)
Supplement: Figure 1—source data 1. [file elife-96470-fig1-data1.xlsx]

## Sheet: Figure 1B
Figure 1B: Body weight curve
	PBS								PBS + L. interrogans								L. biflexa								L. biflexa + L. interrogans
	100	100	100			100	100	100	100	100	100	100	100	100	100	100	100	100	100	100	100	100	100	100	100	100	100	100	100	100	100	100
1	98.6893	99.435	94.4908			107.253	100.168	103.448	96.0304	99.0099	97.1241	100.442	100.847	99.376	96.231	98.2626	103.825	103.653	105.596	101.019	99.0099	99.0637	98.2318	98.7395	97.0915	99.7807	98.4454	99.1921	98.7424	99.2773	98.1261	98.9386
2	102.913	107.779	95.2421			99.1845	99.2034	99.2241	101.9	106.353	103.04	102.165	96.1663	92.2629	90.5373	89.899	111.02	110.594	107.962	112.407	100.792	100.267	98.3792	100.105	105.903	111.403	107.563	103.142	93.8053	96.1156	92.7788	97.1389
3	103.786	109.3	97.6628			101.202	100.545	101.638	102.196	106.559	105.177	102.784	94.996	89.6839	88.2919	89.899	111.658	113.059	107.416	111.019	99.7525	99.1083	98.6248	101.523	103.507	107.895	104.748	101.571	93.8053	96.1156	92.7788	97.1389
4	102.573	105.606	96.7446			101.888	103.019	102.069	102.745	106.106	101.602	105.568	96.2873	91.9301	87.8508	90.4242	112.614	113.151	109.099	111.25	102.277	97.86	99.6071	102.836	104.919	110.658	106.723	110.413	100.745	100.271	99.9543	102.538
5	102.913	107.779	96.6194			101.288	103.983	103.017	102.196	108.086	102.301	104.242	95.8434	92.1381	87.2093	90.8283	113.525	113.288	112.147	110.417	100.99	97.1913	98.2318	100.578	105.646	109.781	107.563	105.655	102.469	101.084	98.4461	102.169
6	104.709	111.386	96.8281			101.717	99.3711	103.017	99.4932	104.951	98.5209	102.298	96.8523	90.8902	87.8107	89.899	113.069	115.982	110.055	111.991	99.0099	96.2996	97.0039	99.2647	103.935	111.097	106.639	105.88	100.606	95.5285	96.8921	99.677
7	102.476	109.605	97.6628			101.631	103.983	104.052	96.7905	104.868	97.6171	99.072	93.4221	87.6872	88.2919	88.0808	115.3	114.84	110.692	109.398	98.0198	95.8538	98.2318	96.9013	104.534	110	106.723	105.61	93.619	90.1084	89.6709	89.9862
8	103.883	111.908	96.4524			103.09	103.48	105.086	95.9459	107.838	97.7814	97.5254	88.3777	81.198	87.089	87.2727	116.576	114.292	114.149	110.972	100.347	97.6371	98.1827	100.63	104.919	109.781	105.546	106.822	91.8491	86.8564	86.6088	94.6008
9	105.291	113.125	99.4157			104.292	104.319	104.741	89.1892	104.703	92.7691	93.2391	82.728		84.0016	83.1111	115.21	112.466	114.65	111.574	102.228	100.045	101.081	103.204	104.02	108.246	104.622	106.059	88.9148		81.1243	92.2935
10	106.942	114.385	101.002			103.176	104.78	106.164	83.4459	97.6073	85.5382	87.2293	79.2978		79.7915	78.7071	115.21	114.247	115.56	112.87	103.861	102.095	100.786	104.412	101.198	108.333	102.101	104.488	85.6544			95.4315
11	108.252	111.256	98.9149			104.421	105.786	109.224	78.2095	87.8713	79.7042	83.871					115.164	117.808	113.831	113.056	103.366	102.095	102.8	103.887	101.796	108.333	96.7647	107.855	83.8379			96.1237
12	108.155	113.385	101.753			104.335	104.99	109.052		79.2079		79.0543					117.486	117.671	115.469	115.046	112.871	90.905	102.898	105.41	100.855	107.983	101.891	105.61	86.912			97.8311
13	108.058	113.516	100.543			104.721	106.918	106.681									116.94	117.717	116.379	113.287	115.347	95.4079	102.161	104.517	101.369	108.772	103.781	106.284	89.2408			100.784
14	107.864	115.602	103.506			105.88	104.277	106.81									117.395	117.352	117.925	116.667	115.594	95.8538	102.161	105.515	104.363	109.868	104.58	105.431	91.7559			104.661
15	107.184	116.037	100.71			105.064	104.277	106.983									116.029	117.808	117.971	115.88	116.733	95.9429	101.572	103.099	104.491	109.035	101.891	104.309	95.3889			105.814

## Sheet: Figure 1C
Figure 1C: Survival curve
	Days	PBS	PBS + L. interrogans	L. biflexa	L. biflexa + L. interrogans
	15	0			0
	11	0			0
	10	0
	15	0		0	0
	11		1
	10				0
	10				0
	9				0
	10
	9
	11
	12		1
	12		1
	12		1
	10		1
	10		1
	10		1
	9		1
	10				1
	9				1

## Sheet: Figure 1D
Figure 1D: Urine PCR
		PBS								L. biflexa								PBS + L. interrogans								L. biflexa + L. interrogans
	1	0	0	0						0	0	0	0					0	0	0	0					0	0
	2	0	0							0	0							0	0
	3	0	0							0	0							0	0							0	0
	4	0	0			0	0	0		0				0	0	0		0	0			0	0	0		0	0	0		0	0	0
	5	0	0	0		0	0	0		0				0	0	0		137.563	0			66.626	117.674	87.12		0	0	0	0	0	0	0
	6	0	0			0	0	0		0	0			0	0	0		1994.08	570.481			952.084	1234.96	7131.88	991.073	1095.05	1183.64			151.438			147.401
	7	0	0	0		0	0	0		0	0	0	0	0	0	0	0	2901.04	3990.09	6108.04		8713.57	66817.2	15219.9	18707.4	86.652				2426.99	2248.6	899.757
	8	0	0	0		0	0	0		0	0	0	0	0	0	0	0					2069.61	2813.07	3023.97						2134.85	4105.56	1444.61	9568.63
	9	0	0			0	0	0		0	0			0	0	0						436.345	1659.77	2268.41						163.79	2544.43	1278.95	310.922
	10	0	0			0	0	0		0	0	0	0	0	0	0	0	3508.23	2587.27			357.758	8262.24	1444.62	1536.19	277.135	497.519			3306.01	2673.91	3480.91	2621.8
	11	0	0			0	0	0		0	0	0	0	0	0	0	0					13906.1	4021.44			856.191				1106.91	11987.2	17372.7
	12	0	0							0	0	0										1477.82	971.883							7581.18	17482.2	9729.43	2391.86
	13	0	0			0	0	0		0	0	0		0	0	0										15497.5				118540	206581	88002.2	134894
	14	0	0			0	0	0		0	0	0		0	0	0										14023.8				174013	17206.4	39997.4	88423.3
	15	0	0	0						0	0	0	0													212251				205617	169258	1.98503e+06	442667

## Sheet: Figure 1E
Figure 1E: Kidney Tissue PCR
	PBS								L. biflexa								PBS + L. interrogans								L. biflexa + L. interrogans
	0	0	0	0	0	0	0	0	0	0	0	0	0	0	0	0	315.547	91.659	88.807	684.517	318.255	138.91	76.387	57.021	21368.6	95.802	51421.9	50.804	8039.43	5026.68	21211.7	26972.9

## Sheet: Figure 1F
Figure 1F: Kidney Culture PCR
	PBS								L. biflexa								PBS + L. interrogans								L. biflexa + L. interrogans
Day3	0	0	0	0	0	0	0	0	0	0	0	0	0	0	0	0	0	0	0	0	0	0	0	0	1492.85	1354.51			4100.36	5293.45	1581.87
Day5	0	0	0	0	0	0	0	0	0	0	0	0	0	0	0	0	0	0	0	0	0	0	0	0	4000.76	2143.58
