# Supplementary material for: Exposure to live saprophytic Leptospira before challenge with a pathogenic serovar prevents severe leptospirosis and promotes kidney homeostasis
Source: eLife. 2024 Nov 11;13:RP96470. doi: 10.7554/eLife.96470 (PMC11554301; doi:10.7554/eLife.96470)
Supplement: Figure 2—figure supplement 1—source data 1. [file elife-96470-fig2-figsupp1-data1.xlsx]

## Sheet: Figure 2-Figure Supplement 1
Figure 2-Figure Supplement 1
	Days	Control								L. biflexa								PBS + L. interrogans								L. biflexa + L. interrogans
	0	0	0	0	0	0	0	0	0	0	0	0	0	0	0	0	0	0	0	0	0	0	0	0	0	0	0	0	0	0	0	0	0
	1	0	0	0	0	0	0	0	0	0	0	0	0	0	0	0	0	13781.4	662.432	3257.5	57097	4455.51	172156	6851.22	1612.69	7677.01	22602.5		1572.73	7946.11
	3	0	0	0	0	0	0	0	0	0	0	0	0	0	0	0	0					102203	58465.1	108759	44499.6					13845.2	19051.5		47912.1
	5	0	0	0	0	0	0	0	0	0	0	0	0	0	0	0	0	6581.85				116792	166978							206897	62327.1
	7	0	0	0	0	0	0	0	0	0	0	0	0	0	0	0	0	8822.73								0	0	0	0	0	0	0	0
	9	0	0	0	0	0	0	0	0	0	0	0	0	0	0	0	0	0	0	0	0	0	0	0	0	0	0	0	0	0	0	0	0
	11	0	0	0	0	0	0	0	0	0	0	0	0	0	0	0	0	0	0	0	0	0	0	0	0	0	0	0	0	0	0	0	0
	13	0	0	0	0	0	0	0	0	0	0	0	0	0	0	0	0	0	0	0	0	0	0	0	0	0	0	0	0	0	0	0	0
	15	0	0	0	0	0	0	0	0	0	0	0	0	0	0	0	0	0	0	0	0	0	0	0	0	0	0	0	0	0	0	0	0
