# Supplementary material for: Exposure to live saprophytic Leptospira before challenge with a pathogenic serovar prevents severe leptospirosis and promotes kidney homeostasis
Source: eLife. 2024 Nov 11;13:RP96470. doi: 10.7554/eLife.96470 (PMC11554301; doi:10.7554/eLife.96470)
Supplement: Figure 2—source data 1. [file elife-96470-fig2-data1.xlsx]

## Sheet: Figure 2B
Figure 2B: Body weight curve
	PBS								PBS + L. interrogans								L. biflexa								L. biflexa + L. interrogans
	100	100	100		100	100	100		100	100	100	100	100	100	100	100	100	100	100	100	100	100	100	100	100	100	100	100	100	100	100	100
1	94.9663	94.1131	94.12		100.085	100.936	110.2		113.232	102.807	101.944	103.198	100.406	100.996	100.935	100.283	100.155	101.871	94.5157	102.495	100.186	101.724	100.127	99.7222	102.298	103.644	102.863	102.798	100.41	99.9213	99.6224	99.9228
2	99.2073	100	99.1		102.137	101.319	101.12		103.053	103.421	102.593	102.613	101.667	100.415	99.9187	100.404	90.0929	91.7517	89.3816	94.7409	95.9108	96.3166	97.5105	98.7302	102.382	103.467	98.3064	99.9595	96.4618	97.1654	96.9411	97.9923
3	97.5822	99.8451	98.6		102.479	101.277	101.2		104.453	105.702	103.241	102.432	100.856	101.992	100.325	99.7978	92.6084	94.4303	93.8156	97.6967	93.3085	95.2978	97.4684	96.4286	101.713	105.467	97.5	101.582	94.8603	96.063	95.8459	96.4479
4	103.686	96.9404	98.3		101.966	102.553	102.1		106.658	107.456	107.5	105.586	101.082	100.415	99.187	100	95.5108	96.0034	95.6048	99.501	95.6506	95.6897	101.055	98.4921	103.677	102.889	99.3548	100.487	95.4562	98.3858	96.4124	97.2201
5	103.924	96.0496	97.12		101.795	102.043	101.9		104.835	105	106.065	103.153	100.946	100.747	101.057	99.8787	95.1238	96.0884	95.7215	98.9635	95.7621	96.395	102.785	98.0159	103.552	101.378	100.121	96.7559	96.2011	98.7008	96.6012	97.6834
6	102.576	100.232	99.13		102.051	103.021	102.1		107.082	110.746	110.972	105.315	103.605	102.697	101.341	98.9891	96.2461	97.1514	98.0163	101.075	96.0223	97.5705	101.561	97.4603	103.301	103.244	100.968	102.595	94.5624	94.8032	95.6949	99.6139
7	102.259	96.2432	100.2		103.333	103.362	103.12		103.393	103.158	106.713	102.342	101.938	102.199	99.187	100.97	92.0279	94.5153	96.2271	97.1209	95.0186	94.9451	98.6498	96.0318	103.301	101.778	100	101.379	93.4823	94.7244	95.8459	96.9112
8	102.854	95.9721	98.75		104.06	104.043	103.98		100.424	102.763	103.704	100.811	102.749	102.905	101.951	100.687	89.8607	94.9405	95.0992	96.1228	91.0781	94.1614	94.0928	89.2857	100.293	103.289	99.5968	100	94.8976	95.3937	95.5438	92.7027
9	101.863	96.3594	98.89		105.556	105.362	104.3		102.757	103.07	104.259	100.586	101.757	102.739	101.545	101.254	90.8669	93.665	95.0992	97.1209	87.2862	93.7696	93.6709	84.3254	99.8746	100.622	100.363	99.5134	93.2961	92.9134	91.8807	89.807
10	102.735	97.0178	99.17		106.496	106	105.92		100.848	96.4474	114.074	113.514	102.749	102.905	102.114	102.709	92.0279	93.4949	95.8382	96.737	84.3866	90.5564	87.4262	80.9524	100	101.911	100.161	99.5945	86.4805	98.0315	90.5589	89.0348
11	103.726	99.6127	101.23		106.282	106.808	106.27		102.714	103.64	105.278	101.892	103.56	103.32	101.057	101.901	90.6347	92.517	94.6324	97.9655	85.8736	87.8135	86.076	79.7619	100.878	100.711	100.766	99.3106	87.2253	98.3465	90.9366	90.4247
12	104.241	99.9225	102.2		106.41	107.021	106.59		105.513	106.579	106.204	104.189	101.397	102.905	102.073	101.415	90.2477	91.4116	93.8934	97.428	88.4758	85.6191	91.2236	82.1429	101.755	101.022	101.814	99.4728	90.8752	100	92.145	93.3591
13	103.092	98.2959	102.5		106.88	107.362	107.31		107.718	107.368	108.519	103.604	101.667	103.569	102.032	101.82	90.7121	92.9422	93.8934	97.0442	89.0706	84.4828	91.5612	86.5079	101.755	101.689	101.21	100.162	91.2477	100.63	92.4471	93.3977
14	102.893	98.2572	101.3		107.692	106.808	106.88		104.326	107.281	107.176	103.153	102.884	103.32	102.846	103.841	88.6223	90.9014	94.438	97.1209	91.3755	83.1505	94.6414	88.2143	100.293	101.956	100.726	101.784	93.1471	101.772	93.278	93.5521
15	102.973	98.3734	102.4		108.034	107.234	107.22		106.87	107.895	106.481	103.514	102.749	102.49	102.764	102.628	88.5062	89.7959	93.2711	95.4319	92.2677	82.0925	92.2363	91.8651	100.836	102.8	101.21	102.109	96.0894	102.992	99.3202	97.027

## Sheet: Figure 2C
Figure 2C: Survival curve
	Days	PBS Control	L. biflexa	PBS + L. interrogans	L. biflexa + L. interrogans
	0	4	1	1	1
	10	4
	11	3
	15	2	1	1	1

## Sheet: Figure 2D
Figure 2D: Urine PCR
		PBS								L. biflexa								PBS + L. interrogans								L. biflexa + L. interrogans
	0
	1
	2
	3
	4	0	0	0	0					0	0	0	0					0	0	0	0					0	0	0	0
	5	0	0	0						0	0	0						0	0	0	0	150.687	1016.36	464.101	701.729	0	0	0	0	163.425		84.567
	6	0	0	0	0					0	0	0	0						0	0	0	2240.73	4292.56	22146.3	4004.47	0	0	0		140.891	2580.96	1630.21	709.652
	7	0	0	0	0					0	0	0	0					341.71	157.571	106.641		1266.12	24672.1	2594.97		116.038			167.565	23214.1	22042.8	4069.35	4631.27
	8	0	0	0						0	0	0						150.317				5866.83	8402.09	797.421						3668.39	8722.78	2092.65
	9	0	0	0	0					0	0	0	0					193.189				4689.12	2432.05	18690.5	6143.97	86.328	124.753			34178.7	39614.8	18226.5	13931
	10	0	0	0	0					0	0	0	0					221.264				23577.3	19111			192.139	87.668			52314.9	58589.3	98046.1
	11	0	0	0	0					0	0	0	0					364.965	198.716	539.056		84482.1				379.25	249.313			51991.3	90328.5	137029	58641.4
	12	0	0	0						0	0	0						9460.89	2568.43	166.713	4431.87	29337.8				1099.44	939.113	844.628		279450	91091.1	86642.2	60464.6
	13	0	0	0	0					0	0	0	0					606003	82922.5	96998.8	27815	231994	58581.6	94614.9		117919	28918	124582	91751	57493	1.80629e+06	145994
	14	0	0	0	0					0	0	0	0					322869	97244.8	125333	71282	1.27315e+06	281010	353781	106747	505743	1.01723e+06	253463	212967	744956	72278.4	260161	77400.3
	15	0	0	0	0					0	0	0	0					191864	77661.6	57733.4	19184.5	12991	72716.1	505463	13440.4	78819.2	421579	2.7845e+06	250832	26661	1.2025e+06	198638	63198.6

## Sheet: Figure 2E
Figure 2E: Kidney Tissue PCR
	PBS								L. biflexa								PBS + L. interrogans								L. biflexa + L. interrogans
	0	0	0	0	0	0	0	0	0	0	0	0	0	0	0	0	5857.13	56161.1	5372.33	473.624	60815.3	116560	142046	382001	6609.94	8287.15	5724.36	3146.53	29412.6	67818.7	27760.4	31105.2

## Sheet: Figure 2F
Figure 2F: Kidney Culture PCR
	PBS								L. biflexa								PBS + L. interrogans								L. biflexa + L. interrogans
Day3	0	0	0	0	0	0	0	0	0	0	0	0	0	0	0	0	18112.4		4681.72	1017.29	2374.07				2716.39	2328.66
Day5	0	0	0	0	0	0	0	0	0	0	0	0	0	0	0	0	14038.9	578.898			51759.8	2457.16	17372.7		1378.1	1207.3
