# Supplementary material for: Exposure to live saprophytic Leptospira before challenge with a pathogenic serovar prevents severe leptospirosis and promotes kidney homeostasis
Source: eLife. 2024 Nov 11;13:RP96470. doi: 10.7554/eLife.96470 (PMC11554301; doi:10.7554/eLife.96470)
Supplement: Figure 3—source data 1. [file elife-96470-fig3-data1.xlsx]

## Sheet: Figure 3B
Figure 3B: Single exposure ColA1
	PBS								L. biflexa								PBS + L. interrogans								L. biflexa + L. interrogans
	1	1.10705					1	0.94932	1.24037	0.270252	0.184821	0.335666	0.933242	0.540738	1.32995	2.6937	8.48052	19.1484		7.69485	35.0507	14.9762	20.3466		2.40699		4.93953	5.14705	4.55091	2.88969	11.495	5.34817

## Sheet: Figure 3D
Figure 3D: Double exposure ColA1
		PBS								L. biflexa								PBS + L. interrogans								L. biflexa + L. interrogans
			1	2.07927	1.55222	1	0.440535	0.726464		0.591538	0.633753	0.881865	2.71032	0.830257		0.919775		15.5213	11.8698	8.53691	7.59615	4.12596	1.73952		0.780838	6.56316	7.807	8.98982	14.2727	2.67461	3.42049	1.67767	1.52907
