# Supplementary material for: Exposure to live saprophytic Leptospira before challenge with a pathogenic serovar prevents severe leptospirosis and promotes kidney homeostasis
Source: eLife. 2024 Nov 11;13:RP96470. doi: 10.7554/eLife.96470 (PMC11554301; doi:10.7554/eLife.96470)
Supplement: Figure 4—source data 1. [file elife-96470-fig4-data1.xlsx]

## Sheet: Figure 4A
Figure 4A: Single exposure IgG subtypes
	Control								L. biflexa								Control + L. interrogans								L. biflexa + L. interrogans
IgG1	0.015383	0.002883	0.002783		0.008417	0.007717	0.001367		0.023633	0.037633	0.018933	0.042833	0.021667	0.003567	0.009167	0.017817	0.085333	0.100483	0.075133		0.013767	0.154667	0.162617	0.130867	0.126933	1.26073			0.266417	0.278517	0.448467	0.072767
IgG2a	-0.00248	-0.00257	0.000325		0.085033	0.077083	0.048433		0.006325	0.095475	0.026575	0.019375	0.157483	0.065933	0.260883	0.178483	0.289375	0.635425	0.254625		0.546783	1.00358	0.435233	0.521683	0.556825	0.718825			1.49123	1.22563	1.07953	1.58248
IgG3	0.125875	0.104375	0.075225		0.184717	0.127017	0.090117		0.135575	0.351325	0.102525	0.194025	0.193417	0.133217	0.234717	0.346967	2.19048	1.23057	0.823025		0.497217	1.55517	0.521417	1.11687	2.06197	1.20198			1.84627	1.26087	1.33082	1.25282

## Sheet: Figure 4B
Figure 4B: Double exposure IgG subtypes
		Control								L. biflexa								Control + L. interrogans								L. biflexa + L. interrogans
	IgG1	0.003267	0.005167	0.001867		0.001867	-0.00193	-0.00173		0.011667	0.002967	0.003867	0.013567	0.008167	0.013417	0.022467	0.023667	0.120217	0.194367	0.148217	0.012617	0.065967	0.110217	0.123967	0.035167	0.076417	0.084167	0.167617	0.018467	0.208517	0.028867	0.184917	0.074067
	IgG2a	0.014483	0.012833	0.011683		0.011083	0.012933	0.027533		0.256333	0.081333	0.203983	0.169183	0.207083	0.449233	0.866633	0.661883	0.442133	0.330133	0.313183	0.206883	0.646133	0.679883	0.481383	0.785583	0.934233	0.584033	0.930533	0.487233	0.844833	0.772933	1.18948	1.39603
	IgG3	0.041267	0.063417	0.051717		0.054667	0.055167	0.053567		0.274767	0.135467	0.196017	0.238217	0.134117	0.262767	0.276517	0.211717	1.49787	0.749267	1.15312	0.403167	0.811917	1.06682	1.25347	0.318867	1.91167	1.22017	1.14677	0.405567	0.740617	0.858317	0.248767	1.37182
