# Supplementary material for: Exposure to live saprophytic Leptospira before challenge with a pathogenic serovar prevents severe leptospirosis and promotes kidney homeostasis
Source: eLife. 2024 Nov 11;13:RP96470. doi: 10.7554/eLife.96470 (PMC11554301; doi:10.7554/eLife.96470)
Supplement: Figure 5—source data 1. [file elife-96470-fig5-data1.xlsx]

## Sheet: Figure 5A
Figure 5A: B Cell
		Control				L. biflexa				Control + L. interrogans				L. biflexa + L. interrogans
	B cell (%)	43	47	42		47.1	45.3	44.7	44.7	55.1	54.7	53.9	57.4	53	56.3	59.9	55.3

## Sheet: Figure5B
Figure 5B: T Cell
		Control				L. biflexa				Control + L. interrogans				L. biflexa + L. interrogans
	T cell (%)	32.2	26.8	30.9		28.6	29.1	28.6	30.3	23.5	23.6	20.6	20.2	23.5	21.4	20.2	21.9

## Sheet: Figure 5C
Figure 5C: NK Cell
		Control				L. biflexa				Control + L. interrogans				L. biflexa + L. interrogans
	NK cell (%)	3.78	5.19	3.79		5.21	3.13	3.3	3.67	3.79	1.75	3.82	2.59	2.87	2.91	3.47	2.35

## Sheet: Figure 5D
Figure 5D: Helper T Cell
		Control				L. biflexa				Control + L. interrogans				L. biflexa + L. interrogans
	Helper T Cell (%)	55.1	53.8	53.3		59.7	58.2	60.9	60	67.6	65.9	65	63.8	68.5	69.3	70.8	68.6

## Sheet: Figure 5E
Figure 5E: Cytotoxic T Cell
			Control				L. biflexa				Control + L. interrogans				L. biflexa + L. interrogans
	Cytotoxic T Cell (%)		32.7	34.6	35.7		29.4	32.2	29.3	31.9	24.7	25.5	25.1	26.8	22.6	22.4	20.4	21.2
