# Supplementary material for: Exposure to live saprophytic Leptospira before challenge with a pathogenic serovar prevents severe leptospirosis and promotes kidney homeostasis
Source: eLife. 2024 Nov 11;13:RP96470. doi: 10.7554/eLife.96470 (PMC11554301; doi:10.7554/eLife.96470)
Supplement: Figure 6—source data 1. [file elife-96470-fig6-data1.xlsx]

## Sheet: Figure 6A
Helper T Cell subsets
Figure 6A: Naïve
		Control				L. biflexa				Control + L. interrogans				L. biflexa + L. interrogans
	Naive (%)	38	35.5	38		33.8	36.6	37	38.4	36	36.8	35.2	34.4	32.7	30.5	28.3	23.4

## Sheet: Figure 6B
Helper T Cell subsets
Figure 6B: Early effector
		Control				L. biflexa				Control + L. interrogans				L. biflexa + L. interrogans
	Early effector (%)	2.42	2.35	2.8		2.35	1.86	3.68	2.48	4.08	4.43	4.95	4.82	5.97	7.48	8.59	11.8

## Sheet: Figure 6C
Helper T Cell subsets
Figure 6C: Effector
		Control				L. biflexa				Control + L. interrogans				L. biflexa + L. interrogans
	Effector (%)	7.96	9.99	7.86		15.8	11.9	14	13	19.1	18.6	17.6	17.6	22.5	24.7	25.8	27.2

## Sheet: Figure 6D
Helper T Cell subsets
Figure 6D: Memory
		Control				L. biflexa				Control + L. interrogans				L. biflexa + L. interrogans
	Memory (%)	6.71	6.04	4.63		7.75	7.82	6.22	6.18	8.39	6.08	7.25	6.94	7.35	6.66	8.24	6.27

## Sheet: Figure 6E
Cytotoxic T Cell subsets
Figure 6E: Naïve
		Control				L. biflexa				Control + L. interrogans				L. biflexa + L. interrogans
	Naive (%)	22.7	25.3	27.7		20.7	22.8	20.9	23.8	18.2	19	18.2	19.1	15.7	16	12.3	10.4

## Sheet: Figure 6F
Cytotoxic T Cell subsets
Figure 6F: Early effector
		Control				L. biflexa				Control + L. interrogans				L. biflexa + L. interrogans
	Early effector (%)	1.5	0.84	1.81		0.84	0.85	1.58	1.03	0.69	1.63	1.12	1.37	1.42	1.74	2.19	4.95

## Sheet: Figure 6G
Cytotoxic T Cell subsets
Figure 6G: Effector
		Control				L. biflexa				Control + L. interrogans				L. biflexa + L. interrogans
	Effector (%)	1.67	1.38	1.43		1.4	1.81	1.94	1.73	1.21	1.25	1.77	2.27	1.78	1.8	2.49	3.54

## Sheet: Figure 6H
Cytotoxic T Cell subsets
Figure 6H: Memory
		Control				L. biflexa				Control + L. interrogans				L. biflexa + L. interrogans
	Memory (%)	6.86	7.1	4.72		6.44	6.69	4.87	5.35	4.66	3.62	4.03	4.12	3.64	2.89	3.33	2.3
